# Supplementary material for: The roles of APOBEC-mediated RNA editing in SARS-CoV-2 mutations, replication and fitness
Source: Sci Rep. 2022 Sep 13;12:14972. doi: 10.1038/s41598-022-19067-x (PMC9470679; doi:10.1038/s41598-022-19067-x)
Supplement: Supplementary file 4 — Supplementary Information 3. [file 41598_2022_19067_MOESM4_ESM.xlsx]

## Sheet: Plasmids
Category	Vector	Sequence	Length	Visualized map
Editor	pcDNA3.1-Ctrl (Empty vector)	GACGGATCGGGAGATCTCCCGATCCCCTATGGTGCACTCTCAGTACAATCTGCTCTGATGCCGCATAGTTAAGCCAGTATCTGCTCCCTGCTTGTGTGTTGGAGGTCGCTGAGTAGTGCGCGAGCAAAATTTAAGCTACAACAAGGCAAGGCTTGACCGACAATTGCATGAAGAATCTGCTTAGGGTTAGGCGTTTTGCGCTGCTTCGCGATGTACGGGCCAGATATACGCGTTGACATTGATTATTGACTAGTTATTAATAGTAATCAATTACGGGGTCATTAGTTCATAGCCCATATATGGAGTTCCGCGTTACATAACTTACGGTAAATGGCCCGCCTGGCTGACCGCCCAACGACCCCCGCCCATTGACGTCAATAATGACGTATGTTCCCATAG…	5421bp
Editor	pcDNA3.1-A1+A1CF	GACGGATCGGGAGATCTCCCGATCCCCTATGGTGCACTCTCAGTACAATCTGCTCTGATGCCGCATAGTTAAGCCAGTATCTGCTCCCTGCTTGTGTGTTGGAGGTCGCTGAGTAGTGCGCGAGCAAAATTTAAGCTACAACAAGGCAAGGCTTGACCGACAATTGCATGAAGAATCTGCTTAGGGTTAGGCGTTTTGCGCTGCTTCGCGATGTACGGGCCAGATATACGCGTTGACATTGATTATTGACTAGTTATTAATAGTAATCAATTACGGGGTCATTAGTTCATAGCCCATATATGGAGTTCCGCGTTACATAACTTACGGTAAATGGCCCGCCTGGCTGACCGCCCAACGACCCCCGCCCATTGACGTCAATAATGACGTATGTTCCCATAG…	8304bp
Editor	pcDNA3.1-A3A	GACGGATCGGGAGATCTCCCGATCCCCTATGGTGCACTCTCAGTACAATCTGCTCTGATGCCGCATAGTTAAGCCAGTATCTGCTCCCTGCTTGTGTGTTGGAGGTCGCTGAGTAGTGCGCGAGCAAAATTTAAGCTACAACAAGGCAAGGCTTGACCGACAATTGCATGAAGAATCTGCTTAGGGTTAGGCGTTTTGCGCTGCTTCGCGATGTACGGGCCAGATATACGCGTTGACATTGATTATTGACTAGTTATTAATAGTAATCAATTACGGGGTCATTAGTTCATAGCCCATATATGGAGTTCCGCGTTACATAACTTACGGTAAATGGCCCGCCTGGCTGACCGCCCAACGACCCCCGCCCATTGACGTCAATAATGACGTATGTTCCCATAG…	6060bp
Editor	pcDNA3.1-A3G	GACGGATCGGGAGATCTCCCGATCCCCTATGGTGCACTCTCAGTACAATCTGCTCTGATGCCGCATAGTTAAGCCAGTATCTGCTCCCTGCTTGTGTGTTGGAGGTCGCTGAGTAGTGCGCGAGCAAAATTTAAGCTACAACAAGGCAAGGCTTGACCGACAATTGCATGAAGAATCTGCTTAGGGTTAGGCGTTTTGCGCTGCTTCGCGATGTACGGGCCAGATATACGCGTTGACATTGATTATTGACTAGTTATTAATAGTAATCAATTACGGGGTCATTAGTTCATAGCCCATATATGGAGTTCCGCGTTACATAACTTACGGTAAATGGCCCGCCTGGCTGACCGCCCAACGACCCCCGCCCATTGACGTCAATAATGACGTATGTTCCCATAG…	6570bp
Reporter	pcDNA3.1-eGFP-SARS-CoV-2-#1	TCAATATTGGCCATTAGCCATATTATTCATTGGTTATATAGCATAAATCAATATTGGCTATTGGCCATTGCATACGTTGTATCTATATCATAATATGTACATTTATATTGGCTCATGTCCAATATGACCGCCATGTTGGCATTGATTATTGACTAGTTATTAATAGTAATCAATTACGGGGTCATTAGTTCATAGCCCATATATGGAGTTCCGCGTTACATAACTTACGGTAAATGGCCCGCCTGGCTGACCGCCCAACGACCCCCGCCCATTGACGTCAATAATGACGTATGTTCCCATAGTAACGCCAATAGGGACTTTCCATTGACGTCAATGGGTGGAGTATTTACGGTAAACTGCCCACTTGGCAGTACATCAAGTGTATCATATGCCAAGTCC…	6540bp
Reporter	pcDNA3.1-eGFP-SARS-CoV-2-#2	TCAATATTGGCCATTAGCCATATTATTCATTGGTTATATAGCATAAATCAATATTGGCTATTGGCCATTGCATACGTTGTATCTATATCATAATATGTACATTTATATTGGCTCATGTCCAATATGACCGCCATGTTGGCATTGATTATTGACTAGTTATTAATAGTAATCAATTACGGGGTCATTAGTTCATAGCCCATATATGGAGTTCCGCGTTACATAACTTACGGTAAATGGCCCGCCTGGCTGACCGCCCAACGACCCCCGCCCATTGACGTCAATAATGACGTATGTTCCCATAGTAACGCCAATAGGGACTTTCCATTGACGTCAATGGGTGGAGTATTTACGGTAAACTGCCCACTTGGCAGTACATCAAGTGTATCATATGCCAAGTCC…	6540bp
Reporter	pcDNA3.1-eGFP-SARS-CoV-2-#3	TCAATATTGGCCATTAGCCATATTATTCATTGGTTATATAGCATAAATCAATATTGGCTATTGGCCATTGCATACGTTGTATCTATATCATAATATGTACATTTATATTGGCTCATGTCCAATATGACCGCCATGTTGGCATTGATTATTGACTAGTTATTAATAGTAATCAATTACGGGGTCATTAGTTCATAGCCCATATATGGAGTTCCGCGTTACATAACTTACGGTAAATGGCCCGCCTGGCTGACCGCCCAACGACCCCCGCCCATTGACGTCAATAATGACGTATGTTCCCATAGTAACGCCAATAGGGACTTTCCATTGACGTCAATGGGTGGAGTATTTACGGTAAACTGCCCACTTGGCAGTACATCAAGTGTATCATATGCCAAGTCC…	6540bp
Reporter	pcDNA3.1-eGFP-SARS-CoV-2-#4	TCAATATTGGCCATTAGCCATATTATTCATTGGTTATATAGCATAAATCAATATTGGCTATTGGCCATTGCATACGTTGTATCTATATCATAATATGTACATTTATATTGGCTCATGTCCAATATGACCGCCATGTTGGCATTGATTATTGACTAGTTATTAATAGTAATCAATTACGGGGTCATTAGTTCATAGCCCATATATGGAGTTCCGCGTTACATAACTTACGGTAAATGGCCCGCCTGGCTGACCGCCCAACGACCCCCGCCCATTGACGTCAATAATGACGTATGTTCCCATAGTAACGCCAATAGGGACTTTCCATTGACGTCAATGGGTGGAGTATTTACGGTAAACTGCCCACTTGGCAGTACATCAAGTGTATCATATGCCAAGTCC…	6540bp
Reporter	pcDNA3.1-eGFP-SARS-CoV-2-#5	TCAATATTGGCCATTAGCCATATTATTCATTGGTTATATAGCATAAATCAATATTGGCTATTGGCCATTGCATACGTTGTATCTATATCATAATATGTACATTTATATTGGCTCATGTCCAATATGACCGCCATGTTGGCATTGATTATTGACTAGTTATTAATAGTAATCAATTACGGGGTCATTAGTTCATAGCCCATATATGGAGTTCCGCGTTACATAACTTACGGTAAATGGCCCGCCTGGCTGACCGCCCAACGACCCCCGCCCATTGACGTCAATAATGACGTATGTTCCCATAGTAACGCCAATAGGGACTTTCCATTGACGTCAATGGGTGGAGTATTTACGGTAAACTGCCCACTTGGCAGTACATCAAGTGTATCATATGCCAAGTCC…	6540bp
Reporter	pcDNA3.1-eGFP-SARS-CoV-2-#6	TCAATATTGGCCATTAGCCATATTATTCATTGGTTATATAGCATAAATCAATATTGGCTATTGGCCATTGCATACGTTGTATCTATATCATAATATGTACATTTATATTGGCTCATGTCCAATATGACCGCCATGTTGGCATTGATTATTGACTAGTTATTAATAGTAATCAATTACGGGGTCATTAGTTCATAGCCCATATATGGAGTTCCGCGTTACATAACTTACGGTAAATGGCCCGCCTGGCTGACCGCCCAACGACCCCCGCCCATTGACGTCAATAATGACGTATGTTCCCATAGTAACGCCAATAGGGACTTTCCATTGACGTCAATGGGTGGAGTATTTACGGTAAACTGCCCACTTGGCAGTACATCAAGTGTATCATATGCCAAGTCC…	6540bp
Reporter	pcDNA3.1-eGFP-SARS-CoV-2-#7	TCAATATTGGCCATTAGCCATATTATTCATTGGTTATATAGCATAAATCAATATTGGCTATTGGCCATTGCATACGTTGTATCTATATCATAATATGTACATTTATATTGGCTCATGTCCAATATGACCGCCATGTTGGCATTGATTATTGACTAGTTATTAATAGTAATCAATTACGGGGTCATTAGTTCATAGCCCATATATGGAGTTCCGCGTTACATAACTTACGGTAAATGGCCCGCCTGGCTGACCGCCCAACGACCCCCGCCCATTGACGTCAATAATGACGTATGTTCCCATAGTAACGCCAATAGGGACTTTCCATTGACGTCAATGGGTGGAGTATTTACGGTAAACTGCCCACTTGGCAGTACATCAAGTGTATCATATGCCAAGTCC…	6540bp

## Sheet: Primers
Primer	Purpose	Sequence (5'-3')	Feature
First round Ctrl-Forward	Sequencing library	CGACGCTCTTCCGATCTNNNNNNNNNNNNNNNACGCTGCTGCCCGACAACCACTAC	15 UID, trinucleotide ACG for Ctrl
First round Ctrl-Reverse	Sequencing library	TGAACCGCTCTTCCGATCTNNNNNNNNNNNNNNNACGACTAAAGGGAAGCGGCCTCATTA	15 UID, trinucleotide ACG for Ctrl
First round A1+A1CF-Forward	Sequencing library	CGACGCTCTTCCGATCTNNNNNNNNNNNNNNNTGACTGCTGCCCGACAACCACTAC	15 UID, trinucleotide TGA for A1+A1CF
First round A1+A1CF-Reverse	Sequencing library	TGAACCGCTCTTCCGATCTNNNNNNNNNNNNNNNTGAACTAAAGGGAAGCGGCCTCATTA	15 UID, trinucleotide TGA for A1+A1CF
First round A3A-Forward	Sequencing library	CGACGCTCTTCCGATCTNNNNNNNNNNNNNNNCATCTGCTGCCCGACAACCACTAC	15 UID, trinucleotide CAT for A3A
First round A3A-Reverse	Sequencing library	TGAACCGCTCTTCCGATCTNNNNNNNNNNNNNNNCATACTAAAGGGAAGCGGCCTCATTA	15 UID, trinucleotide CAT for A3A
First round A3G-Forward	Sequencing library	CGACGCTCTTCCGATCTNNNNNNNNNNNNNNNGTCCTGCTGCCCGACAACCACTAC	15 UID, trinucleotide GTC for A3G
First round A3G-Reverse	Sequencing library	TGAACCGCTCTTCCGATCTNNNNNNNNNNNNNNNGTCACTAAAGGGAAGCGGCCTCATTA	15 UID, trinucleotide GTC for A3G
Second round universal-Forward	Sequencing library	AATGATACGGCGACCACCGAGATCTACACTCTTTCCCTACACGACGCTCTTCCGATC*T*	*=phosphorothioate bond, Illumina flowcell sequence in green
Second round universal-Reverse	Sequencing library	CAAGCAGAAGACGGCATACGAGATCGGTCTCGGCATTCCTGCTGAACCGCTCTTCCGA*T*	*=phosphorothioate bond, Illumina flowcell sequence in green
RdRP-Forward	RT-qPCR	AGAATAGAGCTCGCACCGTA	Nsp12
RdRP-Reverse	RT-qPCR	CTCCTCTAGTGGCGGCTATT	Nsp12
S-Forward	RT-qPCR	GCTGGTGCTGCAGCTTATTA	Spike
S-Reverse	RT-qPCR	AGGGTCAAGTGCACAGTCTA	Spike
N-Forward	RT-qPCR	GGACCCCAAAATCAGCGAAAT	Nucleocapsid
N-Reverse	RT-qPCR	TTCTGGTTACTGCCAGTTGAATCTG	Nucleocapsid
Actin-Forward	RT-qPCR	CTGGCACCCAGCACAATG	Internal control
Actin-Reverse	RT-qPCR	GCCGATCCACACGGAGTACT	Internal control
